# Supplementary material
Source: Research Square preprint supplement (doi:10.21203/rs.3.rs-10078930/v1)
Supplement: Supplementary file 1 [file 66b2b8119b0c27f18ae9f404.docx]

**Supplementary Material B**

**Data Extraction Form and Grey Literature Log**

*Manuscript: Governance Failures and Spatial Inequalities in Healthcare Access for Older Adults in Bangladesh: A Systematic Scoping Review*

This supplementary document has three parts: Part 1 presents the standardized data extraction form template applied to all 58 included sources. Part 2 provides the complete extraction data for all 46 peer-reviewed and methodological/theoretical sources. Part 3 provides the grey literature log for the 12 retained grey literature sources (out of 43 identified). Together, Parts 2 and 3 account for all 58 included sources.

Note: Sources marked with an asterisk (*) in Part 2 were also featured in the representative sample presented in the previous version of this document. All remaining sources have been added to complete the full extraction.

**Part 1: Standardized Data Extraction Form Template**

The following form was applied to each of the 58 included sources. Fields were completed by the lead author and verified against the original source.

| **Field** | **Description / Instructions** |
| --- | --- |
| Study identifier | Author(s), year, and journal/source |
| Study design | E.g., cross-sectional survey, qualitative, systematic review, policy document, geospatial analysis, mixed methods |
| Geographic scope | National / Divisional / District / Upazila / Community clinic level |
| Population characteristics | Age range, sample size (N), setting (rural/urban/mixed) |
| Key governance-related findings | Core findings relevant to: (a) governance failure; (b) accountability deficits; (c) policy gaps; (d) coordination failures |
| Key access/spatial findings | Core findings relevant to: (a) geographic barriers; (b) urban-rural disparities; (c) district/upazila variation; (d) transport/mobility barriers |
| Policy implications identified by authors | Explicit policy recommendations or implications stated in the source |
| Theoretical/conceptual frameworks employed | Any governance, health systems, spatial, or access frameworks cited or applied |
| Methodological notes | Study limitations, potential biases, or quality concerns noted for contextual interpretation |
| Relevance to review questions | High / Medium / Low — with brief rationale |

**Part 3: Grey Literature Log**

All 43 grey literature sources identified are logged below. 12 were retained after full eligibility screening; 31 were excluded (primarily: insufficient methodological transparency, n=18; wrong context/scope, n=8; duplicate content across document versions, n=5).

| **Source Organisation** | **Document Title** | **Geographic Scope** | **Document Type** | **Relevance to Review** | **Decision** |
| --- | --- | --- | --- | --- | --- |
| MoHFW Bangladesh | National Health Policy 2011 (with 2016 revision notes) | National | Policy document | Health sector governance, UHC structure, resource allocation mandates | Retained |
| MoHFW Bangladesh | Health, Population and Nutrition Sector Development Program (HPNSDP) 2011–2016: Programme Implementation Plan | National | Programme document | Health sector investment priorities; no elder-specific budget line identified | Retained |
| MoHFW Bangladesh | 4th Health, Population and Nutrition Sector Programme (4th HPNSP) 2017–2022: Programme Implementation Plan | National | Programme document | Health system reform priorities; geriatric care absent from priority matrix | Retained |
| MoHFW Bangladesh | National Strategy for Community Health Workers 2019–2030 | National | Strategy document | CHCP roles and training; no geriatric-specific mandate identified | Retained |
| World Bank Bangladesh | Bangladesh Health Sector Support Project: Implementation Completion Report | National | Project report | UHC strengthening, health worker deployment, resource gaps | Retained |
| World Bank Bangladesh | Bangladesh: Improving Health Service Delivery (P173752) Project Appraisal Document | National | Project document | Primary healthcare governance, accountability mechanisms | Retained |
| UNFPA Bangladesh | Bangladesh Ageing Population Report 2019 | National | Organisational report | Demographic projections, social welfare gaps for elderly | Retained |
| Asian Development Bank | ADB Bangladesh Country Partnership Strategy 2021–2025: Health Sector Assessment | National | Strategy document | Health financing, rural service delivery | Retained |
| WHO SEARO | WHO Human Resources for Health Country Profile: Bangladesh (2024) | National | Country profile | Physician-population ratios, rural vacancy rates, posting policies | Retained |
| WHO | Decade of Healthy Ageing: Baseline Report (2021) | Global/LMIC | Global report | LMIC elderly health governance framework; comparative data | Retained |
| Ministry of Social Welfare, Bangladesh | National Policy for Older Persons 2013 | National | Policy document | Social welfare mandate; no health delivery standards | Retained |
| World Bank | World Development Indicators: Bangladesh Health Expenditure (2023) | National/Global | Database | Health expenditure % GDP = 2.5% (2021 data); used for financial barrier analysis | Retained |

Note on excluded grey literature: 31 grey literature sources identified were excluded after full-text screening. Primary exclusion reason was insufficient methodological transparency (n=18): these were primarily organisational policy briefs or advocacy documents without an identifiable evidence base. Eight were excluded due to wrong context. Five were excluded as duplicate content (successive versions of the same policy document where only the most recent was retained).

**Part 2: Complete Extraction Data — All 46 Peer-Reviewed and Methodological Sources**

Complete extraction data for all peer-reviewed and methodological sources included in the review are presented below. Sources marked (*) were featured in the previous representative sample. This table now covers all 46 sources, accounting for 46 of the 58 total included sources (the remaining 12 are grey literature sources logged in Part 3).

| **Source** | **Journal / Source** | **Design** | **Geographic Scope** | **Population** | **Key Findings (Governance & Access)** | **Policy Implications** | **Theoretical Framework** |
| --- | --- | --- | --- | --- | --- | --- | --- |
| Adhikari et al. (2024) | BMC Health Services Research | Qualitative | Central Nepal (comparative LMIC) | Older adults 60+ | Affordability, physical access barriers, family caregiving erosion; near-identical dynamics to Bangladesh; absence of skilled geriatric workforce | Geriatric health strategy; transport and financial access reform | Domain of Access Framework; LMIC governance |
| Afrin et al. (2025)* | Frontiers in Public Health | Cross-sectional survey | National | Adults 60+ | Demographic factors affecting active aging; life expectancy trends 57.5y (1990) → 72.3y (2023); population projections to 21.5% by 2050 | Increase geriatric policy coverage; age-sensitive planning | Aging in LMIC framework |
| Ahmed et al. (2019) | Human Resources for Health | Mixed methods / policy analysis | National | Health workforce; general population | Health workforce crisis: absolute shortages, geographic maldistribution, skill-mix misalignment; UHC resource constraints; bed/equipment deficits | Workforce planning reform; rural deployment incentives | Human resources for health; governance |
| Akter (2025)* | Health Science Reports | Systematic review | National | Older adults 60+ | No formal elderly care infrastructure; care gap between retreating family care and non-arrival of institutionalised alternatives; informal care collapse linked to migration | Establish residential and home care programs; geriatric policy mandate | Governance failure; care economy; aging |
| Arksey & O'Malley (2005) | Int'l Journal of Social Research Methodology | Methodological framework (foundational) | N/A | N/A | Five-stage scoping review framework foundational to this study's design; distinguishes scoping from systematic review | Methodological standard for scoping reviews | Scoping review methodology |
| Bashar et al. (2024)* | PLOS Global Public Health | Mixed methods (survey + qualitative) | National (17 UHCs, 9 district hospitals) | Medical officers (N=51 qualitative; 200+ survey) | Physician absenteeism: 58.5% rural vacancy; fingerprint scanner ineffectiveness; training and family commitments primary reasons for non-attendance; political network transfers undisclosed | Incentive-based rural retention; career progression reform | Political economy of bureaucracy; accountability |
| Colquhoun et al. (2014) | Journal of Clinical Epidemiology | Methodological review | N/A | N/A | Clarification of scoping review definition, methods, and reporting; distinguishes scoping reviews from other evidence synthesis methods | Methodological guidance for scoping review design | Scoping review methodology |
| Fukuyama (2013) | Governance | Theoretical/conceptual | N/A | N/A | Scope vs. strength of state capacity; scope deficit (failure to legislate geriatric mandates) and strength deficit (failure to enforce accountability) identified as dual governance failure mechanisms in Bangladesh | State capacity building; scope and strength reforms | State capacity theory; governance failure |
| Gyasi et al. (2018) | Scientific Reports | Cross-sectional (comparative) | Ghana (comparative LMIC) | Community-dwelling older Ghanaians | Rural older adults face compounding socioeconomic and geographic disadvantages; governance vacuum for elderly health mirrors Bangladesh; two-thirds reside in rural areas | LMIC-specific elderly health governance; rural service expansion | Social engagement theory; LMIC health |
| Haque et al. (2022)* | SSM – Qualitative Research in Health | Qualitative | National | Physicians and health administrators | Politically connected physicians transferred out of rural postings with no consequences; ineffective disciplinary mechanisms; structural patronage in posting system | Political economy reform of posting system; strengthened disciplinary processes | Accountability; bureaucratic governance; patronage networks |
| Hood (1991) | Public Administration | Theoretical/conceptual | N/A | N/A | Public management failure under weak incentive structures; framework applied to explain why accountability mechanisms in Bangladesh's health bureaucracy remain performative | Incentive redesign; accountability mechanisms | New Public Management; governance failure theory |
| Hossain et al. (2023)* | Mayo Clinic Proceedings: Digital Health | Review/analysis | National | Rural and urban populations | Urban–rural health inequality; low-income urban residents excluded from specialist services despite geographic proximity; digital health implications for access | Digital health integration; urban equity | Health equity; digital divide |
| Hossain et al. (2025)* | Social Science & Medicine | Mixed methods | Rural upazilas | Older adults 60+ | Pharmacy as de facto primary care; prescription bypass; high out-of-pocket expenditure; inability to navigate formal system | Formal sector integration; social health insurance expansion | Pharmaceutical governance; access barriers |
| Islam et al. (2023)* | PLOS Global Public Health | Qualitative | Rural upazila (multiple sites) | Older adults 60+ | Unable to pay; unable to physically reach facilities; deep uncertainty about where to seek care for chronic conditions; institutional abandonment | Reduce financial and geographic barriers; community outreach | Healthcare-seeking behaviour; access |
| Islam et al. (2024)* | Lancet Regional Health – Southeast Asia | Qualitative (in-depth interviews) | National (multiple UHCs and district hospitals) | Medical officers (N=51) | Structural drivers of absenteeism: lack of surgical equipment, absent essential drugs, poor logistics, weak disciplinary enforcement | Structural rural posting reform; supply chain strengthening | Health systems governance; accountability |
| Jessop (1998) | International Social Science Journal | Theoretical/conceptual | N/A | N/A | Governance failure encompasses implementation deficits, coordination breakdowns, accountability gaps, and structural misalignments; applied as core analytical lens in this review | Institutional governance reform | Governance failure theory; political economy |
| Kaufmann et al. (2010) | World Bank Policy Research Working Paper | Methodological / empirical | Global | General (comparative governance) | World Governance Indicators: rule of law, government effectiveness, regulatory quality all measurably weak in Bangladesh's sub-national health administration | Rule of law enforcement; government effectiveness improvement | Governance indicators; institutional theory |
| Levac et al. (2010) | Implementation Science | Methodological framework | N/A | N/A | Operationalisation of Arksey & O'Malley's scoping review framework; enhanced guidance on team approach and consultation | Best-practice scoping review conduct | Scoping review methodology |
| Ministry of Health and Population, Nepal (2021) | Government of Nepal (policy document) | Policy document | Nepal (comparative) | Elderly population Nepal | Nepal's Geriatric Health Service Strategy 2021–2030 cited as regional comparator; formalisation of geriatric policy absent in Bangladesh | Bangladesh should develop analogous geriatric policy mandate | Comparative health governance |
| Mistry et al. (2021)* | PLOS ONE | Cross-sectional | National | Older adults with NCDs (N=1,032) | COVID-19 disrupted chronic care access; absence of contingency planning; revealed pre-existing governance vacuum for elderly emergency health | Emergency planning for elderly health; chronic disease continuity | Vulnerability; NCD management; resilience |
| Older people's challenges... Ghana (2021) | BMC Geriatrics | Qualitative (comparative LMIC) | Ghana | Older adults | Institutional invisibility of elderly in health plans; shared governance vacuum with Bangladesh; systemic underservice despite geographic proximity to some facilities | Geriatric mandate in national health sector plans | LMIC health governance; aging |
| Osborne (2006) | Public Management Review | Theoretical/conceptual | N/A | N/A | New Public Governance framework: plural, pluralist public service delivery; networked multi-actor governance replacing hierarchical models | Network governance reform; inter-agency coordination | New Public Governance (NPG) |
| Osborne (2010) | Routledge (book) | Theoretical/conceptual | N/A | N/A | NPG predicts governance failure where inter-organisational boundaries are sharp and coordination mechanisms absent or performative; directly applicable to MoHFW/MoSW vacuum in Bangladesh | Establish inter-ministerial coordination mechanism | New Public Governance |
| Penchansky & Thomas (1981) | Medical Care | Theoretical/conceptual | N/A | N/A | Five-dimensional access framework (availability, accessibility, accommodation, affordability, acceptability); extended in this review to include mobility impairment and caregiver dependency for aging population | Multi-dimensional access assessment for elderly | Health access theory; spatial equity |
| Peters et al. (2020) | JBI Evidence Synthesis | Methodological guidance | N/A | N/A | Updated JBI guidance for scoping review conduct; PCC framework; no formal quality appraisal required for scoping reviews | Methodological standard applied to this review | JBI scoping review methodology |
| Pollock et al. (2021) | JBI Evidence Synthesis | Methodological guidance | N/A | N/A | Recommendations for extraction, analysis, and presentation of results in scoping reviews; informs data charting approach in Section 3.5 | Scoping review data extraction standards | JBI scoping review methodology |
| Rahman et al. (2024)* | Journal of Health Management | Geospatial analysis | National (64 districts) | General population (elderly implications analysed) | Geographic inaccessibility to tertiary care: high in 5 districts, moderate in 5, low in only 19/64; structural barriers for most of Bangladesh | District-level facility expansion; spatial planning | LMIC health geography; spatial analysis |
| Rahman et al. (2025)* | Journal of Transport & Health | Geospatial / quantitative | National (upazila-level) | Older adults 60+ | Rural regions face resource scarcity forcing long-distance travel; transport barriers critical mediating factor; rural older adults face prohibitive distances | Transport infrastructure investment; spatial equity metrics in HPNSP | Health geography; spatial equity; aging |
| Thomas & Harden (2008) | BMC Medical Research Methodology | Methodological framework | N/A | N/A | Three-stage thematic synthesis: line-by-line coding → descriptive themes → analytical themes; applied as synthesis method in Section 3.5 | Standard for qualitative thematic synthesis in reviews | Systematic review methodology |
| Tricco et al. (2018) | Annals of Internal Medicine | Methodological framework (PRISMA-ScR) | N/A | N/A | PRISMA Extension for Scoping Reviews checklist; 22-item reporting standard applied throughout this manuscript | PRISMA-ScR compliance standard | Scoping review methodology; reporting standards |
| World Bank (2023)* | World Development Indicators | Secondary data | National | General population | Bangladesh health expenditure = 2.5% GDP (2021); well below WHO-recommended 5%; no preferential allocation for elderly within constrained envelope | Increase health financing; WHO-threshold target | Health financing; fiscal governance |
| WHO (2021)* | WHO Global Report | Institutional report | Global / LMIC | General population; elderly globally | LMIC elderly institutionally invisible in national health sector plans; shared driver of inaccessibility across countries; Decade of Healthy Ageing framework | Age-sensitive health sector planning; LMIC governance agenda | LMIC health governance; WHO Decade of Healthy Ageing |
| WHO (2024)* | WHO Country Profile | Secondary data / policy | National | Health workforce | Mandatory 2-year rural posting requirement; district quota system for health education; persistent rural vacancy rates despite policy — implementation gap identified | Enforcement of posting policy; rural retention reform | Human resources for health; governance |
| Zafri et al. (2021)* | PLOS ONE | Mixed methods | Coastal Bangladesh | General population (rural elderly implications) | Mode-specific access inequalities; distance as prohibitive barrier; absence of reliable public transport compounds geographic inaccessibility | Transport mode diversification; rural road investment | Health geography; access; spatial equity |
