# Supplementary material
Source: Research Square preprint supplement (doi:10.21203/rs.3.rs-10078930/v1)
Supplement: Supplementary file 2 [file a4cf9a1ca4004f1a5e8c8ad9.docx]

**Supplementary Material A**

**PRISMA Extension for Scoping Reviews (PRISMA-ScR) Compliance Checklist**

*Manuscript: Governance Failures and Spatial Inequalities in Healthcare Access for Older Adults in Bangladesh: A Systematic Scoping Review*

Reference: Tricco, A. C., et al. (2018). PRISMA extension for scoping reviews (PRISMA-ScR): Checklist and explanation. Annals of Internal Medicine, 169(7), 467–473.

| **Section and Topic** | **Item #** | **PRISMA-ScR Recommendation** | **Location in Manuscript** |
| --- | --- | --- | --- |
| TITLE | 1 | Identify the report as a scoping review. | Title page: 'A Systematic Scoping Review' |
| ABSTRACT | 2 | Provide a structured summary including: background, objectives, eligibility criteria, sources of evidence, charting methods, results, and conclusions that relate to the review questions and objectives. | Abstract, pp. 1–2. All elements addressed including governance failure argument, PRISMA-ScR adherence, 58 sources, key themes, and reform framework. |
| INTRODUCTION — Rationale | 3 | Describe the rationale for the review in the context of what is already known. Explain why the review questions/objectives lend themselves to a scoping review approach. | Section 1 (Introduction), pp. 2–3. Scoping review justified by disciplinary heterogeneity and the emergent nature of the governance-geriatric health literature. |
| INTRODUCTION — Objectives | 4 | Provide an explicit statement of the objective(s) and question(s) addressed by the review, using the PCC (Population, Concept, Context) framework or other relevant frameworks where appropriate. | Section 3.2 (Research Questions), p. 5. PCC framework applied explicitly. Overarching and three subsidiary questions stated. |
| METHODS — Protocol and registration | 5 | Indicate whether a review protocol exists; state if and where it can be accessed (e.g., a web address); and, if available, provide registration information, including the registration number. | No pre-registration was conducted for this review. This limitation is acknowledged. |
| METHODS — Eligibility criteria | 6 | Specify characteristics of the sources of evidence used as eligibility criteria (e.g., years considered, language, publication status), and provide a rationale. | Section 3.4 (Inclusion and Exclusion Criteria), p. 6. English/Bengali, 2013–2025, peer-reviewed and grey literature, empirical data or substantive policy analysis required. |
| METHODS — Information sources | 7 | Describe all information sources in the search (e.g., databases with date of last search, contact with authors to identify additional sources). See Supplementary Search String table below. | Section 3.3, p. 5. Six databases searched (PubMed/MEDLINE, Scopus, Web of Science, Google Scholar, BanglaJOL, WHO Global Health Library) plus systematic grey literature search. Databases last searched April 2025. |
| METHODS — Search | 8 | Present the full electronic search strategy for at least one database, including any filters applied. | See Table S1 (Search Strings) below in this document. |
| METHODS — Selection of sources of evidence | 9 | State the process for selecting sources of evidence (i.e., screening and eligibility) included in the scoping review. | Section 3.4, p. 6. Two-stage screening: title/abstract (n = 890), then full-text (n = 176). Exclusion reasons categorized (Table 1, main manuscript). |
| METHODS — Data charting process | 10 | Describe the methods of charting data from the included sources of evidence (e.g., calibrated form or forms, done independently or in duplicate) and any processes for obtaining and confirming data from investigators. | Section 3.5, p. 6. Standardized extraction form used (Supplementary Material B). Data charted by lead author; verification conducted against original sources. |
| METHODS — Data items | 11 | List and define all variables for which data were sought and any assumptions and simplifications made. | Section 3.5, p. 6. Variables: study design; geographic scope; population characteristics; governance-related findings; policy implications; theoretical frameworks. Full extraction form in Supplementary Material B. |
| METHODS — Critical appraisal of individual sources | 12 | If done, provide a rationale for conducting a critical appraisal of included sources; describe the methods used and how this information was used in any data synthesis. | Formal quality appraisal not conducted, consistent with scoping review methodology (Arksey & O'Malley, 2005; Peters et al., 2020). Methodological notes recorded and used in contextual interpretation throughout Section 4. |
| METHODS — Synthesis of results | 13 | Describe the methods of handling and summarizing the data that were charted. | Section 3.5, p. 6. Thematic synthesis following Thomas & Harden (2008): line-by-line coding → descriptive themes → analytical themes. No meta-analysis performed. |
| RESULTS — Selection of sources of evidence | 14 | Give numbers of sources of evidence screened, assessed for eligibility, and included in the review, with reasons for exclusions at each stage, ideally using a flow diagram. | Table 1 (PRISMA-ScR flow), p. 7. Records identified: 890; excluded at screening: 714; full-text assessed: 176; excluded with reasons: 118 (categorized); included: 58. |
| RESULTS — Characteristics of sources of evidence | 15 | For each source of evidence, present characteristics for which data were charted and provide the citations. | Section 4 (Findings), pp. 7–14. Study characteristics woven into thematic synthesis; all sources cited. Full extraction data available upon request. |
| RESULTS — Critical appraisal within sources | 16 | If done, report the critical appraisal scores or ratings of the included sources of evidence. | Not applicable. Critical appraisal not conducted per scoping review protocol. |
| RESULTS — Results of individual sources | 17 | For each included source of evidence, report the relevant data that were charted that relate to the review objective and question. | Section 4 (Findings), pp. 7–14. Relevant data reported thematically across five subsections. |
| RESULTS — Synthesis of results | 18 | Summarize and/or present the charting results as they relate to the review objective and question. | Sections 4 and 5. Thematic synthesis (Section 4) followed by analytical discussion of mechanisms (Section 5). |
| DISCUSSION — Summary of evidence | 19 | Summarize the main results (including an overview of concepts, themes, and types of evidence available), explain how they relate to the review question and objectives, and consider the relevance to key stakeholders. | Section 7 (Conclusion), pp. 17–18. Main results summarized; implications for policy stakeholders discussed. |
| DISCUSSION — Limitations | 20 | Discuss the limitations of the scoping review process. | No pre-registration; grey literature may not be exhaustive; included literature predominantly English-language, which may under-represent Bengali-medium policy documents; methodological heterogeneity of included sources limits comparability. |
| DISCUSSION — Conclusions | 21 | Provide a general interpretation of the results with respect to the review question and objectives, and describe implications for future research and/or practice. | Section 7 (Conclusion), pp. 17–18. General interpretation, LMIC comparative implications, and future research agenda provided. |
| FUNDING | 22 | Describe sources of funding or other support (e.g., supply of data); role of funders. | Declarations section: No funding received. No funder role. |

**Table S1: Database-Specific Search Strings**

| **Database** | **Search String (last searched April 2025)** |
| --- | --- |
| PubMed/MEDLINE | (elderly[MeSH] OR "older adults"[tiab] OR "aged population"[tiab] OR geriatric[tiab] OR aging[MeSH]) AND ("healthcare access"[tiab] OR "health service utilization"[tiab] OR "governance failure"[tiab] OR "health inequality"[tiab] OR "spatial equity"[tiab] OR "physician distribution"[tiab]) AND (Bangladesh[tiab] OR "South Asia"[tiab] OR "low-income country"[tiab]) |
| Scopus | TITLE-ABS-KEY((elderly OR "older adults" OR "aged population" OR geriatric OR aging) AND ("healthcare access" OR "health service utilization" OR "governance failure" OR "health inequality" OR "spatial equity" OR "physician distribution") AND (Bangladesh OR "South Asia" OR "low-income country")) AND PUBYEAR > 2012 |
| Web of Science | TS=((elderly OR "older adults" OR geriatric OR aging) AND ("healthcare access" OR "governance failure" OR "health inequality" OR "spatial equity") AND (Bangladesh OR "South Asia")) AND PY=2013-2025 |
| Google Scholar | "elderly" OR "older adults" "healthcare access" OR "health inequality" "governance" "Bangladesh" (2013–2025; first 200 results screened by relevance) |
| BanglaJOL | "elderly" OR "older adults" AND "health" AND "Bangladesh" — full archive searched by keyword, 2013–2025 |
| WHO Global Health Library | "elderly" OR "geriatric" AND "Bangladesh" AND ("health access" OR "governance") — date limited 2013–2025 |

Note on grey literature search: Systematic keyword searches were conducted on the publication archives of: (1) Ministry of Health and Family Welfare Bangladesh (mohfw.gov.bd); (2) World Bank Bangladesh Country Office (worldbank.org/bangladesh); (3) UNFPA Bangladesh (bangladesh.unfpa.org); (4) Asian Development Bank Bangladesh (adb.org, country: Bangladesh); and (5) WHO South-East Asia Regional Office (who.int/southeastasia). Search terms applied: 'elderly', 'older adults', 'geriatric', 'health', 'governance', limited to documents dated 2013–2025. Retrieved documents were logged and subjected to the same inclusion/exclusion criteria as database results. A total of 43 grey literature sources were identified; 12 were retained after screening.
